# Supplementary material
Source: ML conference proceedings conference paper supplement (https://proceedings.mlr.press/v130/teymur21a.html)
Supplement: Supplementary file 1 [file teymur21a-supp.pdf]

## Supplementary Material

This supplement is structured as follows: In Appendix A we present proofs for all novel theoretical results stated in Section 5 of the main text. In Appendices B and C we provide additional experimental results to support the discussion in Section 4 of the main text.

### A Proof of Theoretical Results

In what follows we let  $\mathcal{H}$  denote the reproducing kernel Hilbert space  $\mathcal{H}(k)$  reproduced by the kernel  $k$  and let  $\|\cdot\|_{\mathcal{H}}$  denote the induced norm in  $\mathcal{H}$ .

#### A.1 Proof of Theorem 1

To start the proof, define

$$\begin{aligned} a_m &:= (ms)^2 \text{MMD}_{\mu,k} \left( \frac{1}{ms} \sum_{i=1}^m \sum_{j=1}^s \delta(x_{\pi(i,j)}) \right)^2 \\ &= \sum_{i=1}^m \sum_{i'=1}^m \sum_{j=1}^s \sum_{j'=1}^s k(x_{\pi(i,j)}, x_{\pi(i',j')}) - 2ms \sum_{i=1}^m \sum_{j=1}^s \int k(x_{\pi(i,j)}, x) d\mu(x) + (ms)^2 \iint k(x, x') d\mu(x) d\mu(x') \\ f_m(\cdot) &:= \sum_{i=1}^m \sum_{j=1}^s k(x_{\pi(i,j)}, \cdot) - ms \int k(\cdot, x) d\mu(x) \end{aligned}$$

and note immediately that  $a_m = \|f_m\|_{\mathcal{H}}^2$ . Then we can write a recursive relation

$$\begin{aligned} a_m &= a_{m-1} + \underbrace{\sum_{j=1}^s \sum_{j'=1}^s k(x_{\pi(m,j)}, x_{\pi(m,j')}) + 2 \sum_{i=1}^{m-1} \sum_{j=1}^s \sum_{j'=1}^s k(x_{\pi(m,j)}, x_{\pi(i,j')}) - 2ms \sum_{j=1}^s \int k(x_{\pi(m,j)}, x) d\mu(x)}_{(*)} \\ &\quad - \underbrace{2s \sum_{i=1}^{m-1} \sum_{j=1}^s \int k(x_{\pi(i,j)}, x) d\mu(x) + s^2(2m-1) \iint k(x, x') d\mu(x) d\mu(x')}_{(**)} \end{aligned}$$

We will first derive an upper bound for (\*), then one for (\*\*).

**Bounding (\*)**: Noting that the algorithm chooses the  $S \in \{1, \dots, n\}^s$  that minimises

$$\begin{aligned} \sum_{j \in S} \sum_{j' \in S} k(x_j, x_{j'}) + 2 \sum_{j \in S} \sum_{j'=1}^s \sum_{i=1}^{m-1} k(x_j, x_{\pi(i,j')}) - 2ms \sum_{j \in S} \int k(x_j, x) d\mu(x) \\ = \sum_{j \in S} \sum_{j' \in S} k(x_j, x_{j'}) - 2s \sum_{j \in S} \int k(x_j, x) d\mu(x) + 2 \sum_{j \in S} f_{m-1}(x_j), \end{aligned}$$

we therefore have that

$$\begin{aligned} (*) &= \min_{S \in \{1, \dots, n\}^s} \left[ \sum_{j \in S} \sum_{j' \in S} k(x_j, x_{j'}) - 2s \sum_{j \in S} \int k(x_j, x) d\mu(x) + 2 \sum_{j \in S} f_{m-1}(x_j) \right] \\ &\leq \max_{S \in \{1, \dots, n\}^s} \left[ \sum_{j \in S} \sum_{j' \in S} k(x_j, x_{j'}) - 2s \sum_{j \in S} \int k(x_j, x) d\mu(x) \right] + 2 \min_{S \in \{1, \dots, n\}^s} \sum_{j \in S} f_{m-1}(x_j) \\ &= \max_{S \in \{1, \dots, n\}^s} \left[ \sum_{j \in S} \sum_{j' \in S} k(x_j, x_{j'}) - 2s \sum_{j \in S} \int \langle k(x_j, \cdot), k(x, \cdot) \rangle_{\mathcal{H}} d\mu(x) \right] + 2 \min_{S \in \{1, \dots, n\}^s} \sum_{j \in S} f_{m-1}(x_j) \quad (8) \end{aligned}$$

$$\leq \max_{S \in \{1, \dots, n\}^s} \left[ \sum_{j \in S} \sum_{j' \in S} k(x_j, x_{j'}) + 2s \sum_{j \in S} \|k(x_j, \cdot)\|_{\mathcal{H}} \cdot \int \|k(x, \cdot)\|_{\mathcal{H}} d\mu(x) \right] + 2 \min_{S \in \{1, \dots, n\}^s} \sum_{j \in S} f_{m-1}(x_j) \quad (9)$$

$$\leq s^2 \max_{j \in \{1, \dots, n\}} k(x_j, x_j) + 2s^2 \max_{j \in \{1, \dots, n\}} \sqrt{k(x_j, x_j)} \cdot \int \sqrt{k(x, x)} d\mu(x) + 2 \min_{S \in \{1, \dots, n\}^s} \sum_{j \in S} f_{m-1}(x_j)$$

$$\leq s^2 C_{n,k}^2 + 2s^2 C_{n,k} \left( \int k(x, x) d\mu(x) \right)^{1/2} + 2 \min_{S \in \{1, \dots, n\}^s} \sum_{j \in S} f_{m-1}(x_j) \quad (10)$$

$$= s^2 C_{n,k}^2 + 2s^2 C_{n,k} C_{\mu,k} + 2 \min_{S \in \{1, \dots, n\}^s} \sum_{j \in S} f_{m-1}(x_j) \quad (11)$$

In (8) we used the reproducing property, while in (9) we used the Cauchy–Schwarz inequality and in (10) we used Jensen’s inequality. To bound the third term in (11), we write

$$\min_{S \in \{1, \dots, n\}^s} \sum_{j \in S} f_{m-1}(x_j) = \min_{S \in \{1, \dots, n\}^s} \left\langle f_{m-1}, \sum_{j \in S} k(\cdot, x_j) \right\rangle_{\mathcal{H}}$$

Define  $\mathcal{M}$  as the convex hull in  $\mathcal{H}$  of  $\left\{ s^{-1} \sum_{j \in S} k(\cdot, x_j), S \in \{1, \dots, n\}^s \right\}$ . Since the extreme points of  $\mathcal{M}$  correspond to the vertices  $(x_i, \dots, x_i)$  we have that

$$\mathcal{M} = \left\{ \sum_{i=1}^n c_i k(\cdot, x_i) : c_i \geq 0, \sum_{i=1}^n c_i = 1 \right\}.$$

Then we have, for any  $h \in \mathcal{M}$ ,

$$\langle f_{m-1}, h \rangle_{\mathcal{H}} = \left\langle f_{m-1}, \sum_{i=1}^n c_i k(\cdot, x_i) \right\rangle_{\mathcal{H}} = \sum_{i=1}^n c_i f_{m-1}(x_i).$$

This linear combination is clearly minimised by taking each of the  $x_i$  equal to a candidate point  $x_j$  that minimises  $f_{m-1}(x_j)$ , and taking the corresponding  $c_j = 1$ , and all other  $c_i = 0$ . Now consider an element  $h_w = \sum_{i=1}^n w_i k(\cdot, x_i)$  for which the weights  $w = (w_1, \dots, w_n)^\top$  minimise  $\text{MMD}_{\mu,k}(\sum_{i=1}^n w_i \delta(x_i))$  subject to  $1^\top w = 1$  and  $w_i \geq 0$ . Clearly  $h_w \in \mathcal{M}$ . Thus

$$\min_{S \in \{1, \dots, n\}^s} \sum_{j \in S} f_{m-1}(x_j) = s \cdot \inf_{h \in \mathcal{M}} \langle f_{m-1}, h \rangle_{\mathcal{H}} \leq s \cdot \langle f_{m-1}, h_w \rangle_{\mathcal{H}}.$$

Combining this with (11) provides an overall bound on (\*).

**Bounding (\*\*):** To upper bound (\*\*) we can in fact just use an equality;

$$\begin{aligned} (**) &= -2s \left[ \sum_{i=1}^{m-1} \sum_{j=1}^s \int k(x_{\pi(i,j)}, x) d\mu(x) + s(m-1) \iint k(x, x') d\mu(x) d\mu(x') \right] \\ &\quad + s^2 \iint k(x, x') d\mu(x) d\mu(x') \\ &= -2s \langle f_{m-1}, h_\mu \rangle_{\mathcal{H}} + s^2 \|h_\mu\|_{\mathcal{H}}^2 \end{aligned}$$

where  $h_\mu = \int k(\cdot, x) d\mu(x)$ .

**Bound on the Iterates:** Combining our bounds on (\*) and (\*\*), we obtain

$$\begin{aligned} a_m &\leq a_{m-1} + s^2 C_{n,k}^2 + 2s^2 C_{n,k} C_{\mu,k} + 2s \langle f_{m-1}, h_w \rangle_{\mathcal{H}} - 2s \langle f_{m-1}, h_\mu \rangle_{\mathcal{H}} + s^2 \|h_\mu\|_{\mathcal{H}}^2 \\ &= a_{m-1} + s^2 C_{n,k}^2 + 2s^2 C_{n,k} C_{\mu,k} + 2s \langle f_{m-1}, h_w - h_\mu \rangle_{\mathcal{H}} + s^2 \|h_\mu\|_{\mathcal{H}}^2 \\ &\leq a_{m-1} + s^2 C_{n,k}^2 + 2s^2 C_{n,k} C_{\mu,k} + 2s \|f_{m-1}\|_{\mathcal{H}} \cdot \|h_w - h_\mu\|_{\mathcal{H}} + s^2 \|h_\mu\|_{\mathcal{H}}^2 \\ &\leq a_{m-1} + (s^2 C_{n,k}^2 + 2s^2 C_{n,k} C_{\mu,k} + s^2 C_{\mu,k}^2) + 2s \sqrt{a_{m-1}} \cdot \|h_w - h_\mu\|_{\mathcal{H}} \end{aligned}$$

The last line arises because

$$\|h_\mu\|_{\mathcal{H}}^2 = \iint k(x, x') \, d\mu(x) \, d\mu(x') = \iint \langle k(x, \cdot), k(x', \cdot) \rangle \, d\mu(x) \, d\mu(x') \quad (12)$$

$$\begin{aligned} &\leq \iint |\langle k(x, \cdot), k(x', \cdot) \rangle| \, d\mu(x) \, d\mu(x') \\ &\leq \iint \|k(x, \cdot)\|_{\mathcal{H}} \|k(x', \cdot)\|_{\mathcal{H}} \, d\mu(x) \, d\mu(x') \end{aligned} \quad (13)$$

$$\begin{aligned} &= \left( \int \sqrt{k(x, x)} \, d\mu(x) \right)^2 \\ &\leq \int k(x, x) \, d\mu(x) = C_{\mu, k}^2. \end{aligned} \quad (14)$$

In (12) we used the reproducing property, while in (13) we used the Cauchy–Schwarz inequality and in (14) we used Jensen’s inequality.

We now note that

$$\begin{aligned} \|h_w - h_\mu\|_{\mathcal{H}}^2 &= \langle h_w - h_\mu, h_w - h_\mu \rangle_{\mathcal{H}} \\ &= \left\langle \sum_{i=1}^n w_i k(\cdot, x_i) - \int k(\cdot, x) \, d\mu(x), \sum_{i'=1}^n w_{i'} k(\cdot, x_{i'}) - \int k(\cdot, x') \, d\mu(x') \right\rangle_{\mathcal{H}} \\ &= \sum_{i=1}^n \sum_{i'=1}^n w_i w_{i'} k(x_i, x_{i'}) - 2 \sum_{i=1}^n w_i \int k(x_i, x) \, d\mu(x) + \iint k(x, x') \, d\mu(x) \, d\mu(x') \\ &= \text{MMD}_{\mu, k} \left( \sum_{i=1}^n w_i \delta(x_i) \right)^2 =: \Phi^2, \end{aligned}$$

which gives

$$a_m \leq a_{m-1} + s^2(C_{n, k} + C_{\mu, k})^2 + 2s\sqrt{a_{m-1}} \cdot \Phi$$

as an overall bound on the iterates  $a_m$ .

**Inductive Argument:** Next we follow a similar argument to Theorem 1 in Riabiz et al. (2020) to establish an induction in  $a_m$ . Defining  $C^2 := (C_{n, k} + C_{\mu, k})^2$  for brevity and noting that  $C^2$  is a constant satisfying  $C^2 \geq 0$ , we assert

$$a_m \leq (sm)^2(\Phi^2 + K_m), \quad \text{with} \quad K_m := \frac{1}{m}(C^2 - \Phi^2) \sum_{j=1}^m \frac{1}{j}$$

For  $m = 1$ , we have  $a_1 \leq s^2(C_{n, k}^2 + 2C_{n, k}C_{\mu, k} + C_{\mu, k}^2) = s^2C^2$ , so the root of the induction holds. We now assume that  $a_{m-1} \leq s^2(m-1)^2(\Phi^2 + K_{m-1})$ . Then

$$\begin{aligned} a_m &\leq a_{m-1} + s^2C^2 + 2s\sqrt{a_{m-1}} \cdot \Phi \\ &\leq s^2(m-1)^2(\Phi^2 + K_{m-1}) + s^2C^2 + 2s^2(m-1)\Phi\sqrt{\Phi^2 + K_{m-1}} \\ &\leq s^2 \left[ (m-1)^2(\Phi^2 + K_{m-1}) + C^2 + (m-1)(2\Phi^2 + K_{m-1}) \right] \\ &= s^2 \left[ (m^2 - 1)\Phi^2 + m(m-1)K_{m-1} + C^2 \right] \\ &= s^2 \left[ (m^2 - 1)\Phi^2 + m(C^2 - \Phi^2) \sum_{j=1}^{m-1} \frac{1}{j} + C^2 \right] \\ &= s^2 \left[ (m^2 - 1)\Phi^2 + m(C^2 - \Phi^2) \sum_{j=1}^m \frac{1}{j} - m(C^2 - \Phi^2) \frac{1}{m} + C^2 \right] \\ &= s^2 \left[ m^2\Phi^2 + m(C^2 - \Phi^2) \sum_{j=1}^m \frac{1}{j} \right] \\ &= (sm)^2(\Phi^2 + K_m), \end{aligned} \quad (15)$$

which proves the induction. Here (15) follows from the fact that for any  $a, b > 0$ , it holds that  $2a\sqrt{a^2 + b} \leq 2a^2 + b$ .

**Overall Bound:** To complete the proof, we first show that  $\Phi^2 \leq C^2$  by writing

$$\Phi^2 = \|h_w - h_\mu\|_{\mathcal{H}}^2 \leq \|h_w\|_{\mathcal{H}}^2 + 2\|h_w\|_{\mathcal{H}} \cdot \|h_\mu\|_{\mathcal{H}} + \|h_\mu\|_{\mathcal{H}}^2$$

and noting that, since  $k(x_i, x_{i'}) \leq \sqrt{k(x_i, x_i)}\sqrt{k(x_{i'}, x_{i'})}$  and  $\sum_{i=1}^n w_i = 1$ , it holds that

$$\|h_w\|_{\mathcal{H}}^2 = \sum_{i=1}^n \sum_{i'=1}^n w_i w_{i'} k(x_i, x_{i'}) \leq C_{n,k}^2.$$

We have already shown that  $\|h_\mu\|^2 \leq C_{\mu,k}^2$ , thus it follows that  $\Phi^2 \leq C_{n,k}^2 + 2C_{n,k}C_{\mu,k} + C_{\mu,k}^2 \equiv C^2$  as required.

Using this bound in conjunction with the elementary series inequality  $\sum_{j=1}^m j^{-1} \leq (1 + \log m)$ , we have  $K_m \geq 0$  and

$$K_m = \frac{1}{m}(C^2 - \Phi^2) \sum_{j=1}^m \frac{1}{j} \leq \frac{1}{m}C^2 \sum_{j=1}^m \frac{1}{j} \leq \left(\frac{1 + \log m}{m}\right)C^2$$

Finally, the theorem follows by noting

$$\text{MMD}_{\mu,k} \left( \frac{1}{ms} \sum_{i=1}^m \sum_{j=1}^s \delta(x_{\pi(i,j)}) \right)^2 = \frac{a_m}{(sm)^2} \leq \Phi^2 + K_m = \Phi^2 + \left(\frac{1 + \log m}{m}\right)C^2,$$

as claimed.  $\square$

**Remark:** We observe that, in the myopic case only ( $s = 1$ ), one can alternatively recover Theorem 1 as a consequence of Theorem 1 in Riabiz et al. (2020) (refer also to Theorem 5 of Chen et al., 2019). This can be seen by noting that  $\text{MMD}_{\mu,k_0}(\nu) = \text{MMD}_{\mu,k}(\nu)$  for all  $\nu \in \mathcal{P}(\mathcal{X})$ , where  $k_0$  is the kernel

$$k_0(x, y) := k(x, y) - \int k(x, x')d\mu(x') - \int k(y, y')d\mu(y') + \iint k(x', y')d\mu(x')d\mu(y'), \quad (16)$$

which satisfies the precondition  $\int k_0(x, y')d\mu(y') = 0$  for all  $x \in \mathcal{X}$  in Theorem 1 of Riabiz et al. (2020). Indeed,

$$\begin{aligned} \text{MMD}_{\mu,k_0}(\nu)^2 &= \left\| \int k_0(\cdot, y')d\nu(y') - \int k_0(\cdot, y')d\mu(y') \right\|_{\mathcal{H}(k_0)}^2 \\ &= \left\| \int k_0(\cdot, y')d\nu(y') \right\|_{\mathcal{H}(k_0)}^2 \\ &= \iint \left[ k(x, y) - \int k(x, y')d\mu(y') - \int k(x', y)d\mu(x') + \iint k(x', y')d\mu(x')d\mu(y') \right] d\nu(x)d\nu(y) \\ &= \iint k(x, y)d\mu(x)d\mu(y) - \iint k(x, y)d\mu(x)d\nu(y) - \iint k(x, y)d\nu(x)d\nu(y) \\ &\quad + \iint k(x, y)d\nu(x)d\nu(y) \\ &= \text{MMD}_{\mu,k}(\nu)^2. \end{aligned}$$

## A.2 Proof of Theorem 2

First note that the preconditions of Theorem 1 are satisfied. We may therefore take expectations of the bound obtained in Theorem 1, to obtain that:

$$\mathbb{E} \left[ \text{MMD}_{\mu,k} \left( \frac{1}{ms} \sum_{i=1}^m \sum_{j=1}^s \delta(x_{\pi(i,j)}) \right)^2 \right] \leq \mathbb{E} \left[ \min_{\substack{1^T w = 1 \\ w_i \geq 0}} \text{MMD}_{\mu,k} \left( \sum_{i=1}^n w_i \delta(x_i) \right)^2 \right] + \mathbb{E}[C^2] \left( \frac{1 + \log m}{m} \right), \quad (17)$$

To bound the first expectation we proceed as follows:

$$\begin{aligned}
 \mathbb{E} \left[ \min_{\substack{1^\top w=1 \\ w_i \geq 0}} \text{MMD}_{\mu,k} \left( \sum_{i=1}^n w_i \delta(x_i) \right)^2 \right] &\leq \mathbb{E} \left[ \text{MMD}_{\mu,k} \left( \frac{1}{n} \sum_{i=1}^n \delta(x_i) \right)^2 \right] \tag{18} \\
 &= \mathbb{E} \left[ \frac{1}{n^2} \sum_{i=1}^n \sum_{j=1}^n k(x_i, x_j) - \frac{2}{n} \sum_{i=1}^n \int k(x, x_i) d\mu(x) + \iint k(x, y) d\mu(x) d\mu(y) \right] \\
 &= \mathbb{E} \left[ \frac{1}{n^2} \sum_{i=1}^n \sum_{j=1}^n k(x_i, x_j) \right] - \iint k(x, y) d\mu(x) d\mu(y) \quad (\text{since } x_i \sim \mu) \\
 &= \mathbb{E} \left[ \frac{1}{n^2} \sum_{i=1}^n k(x_i, x_i) + \frac{1}{n^2} \sum_{i=1}^n \sum_{j \neq i} k(x_i, x_j) \right] - \iint k(x, y) d\mu(x) d\mu(y) \\
 &= \mathbb{E} \left[ \frac{1}{n^2} \sum_{i=1}^n k(x_i, x_i) \right] - \frac{1}{n} \iint k(x, y) d\mu(x) d\mu(y) \quad (\text{since } x_i \sim \mu) \\
 &= \frac{1}{n} \mathbb{E} [k(x_1, x_1)] - \frac{C_{\mu,k}^2}{n} \\
 &= \frac{1}{n\gamma} \mathbb{E} \left[ \log e^{\gamma k(x_i, x_i)} \right] - \frac{C_{\mu,k}^2}{n} \\
 &\leq \frac{1}{n\gamma} \log \mathbb{E} \left[ e^{\gamma k(x_i, x_i)} \right] - \frac{C_{\mu,k}^2}{n} \\
 &\leq \frac{1}{n\gamma} \log(C_1) - \frac{C_{\mu,k}^2}{n} \\
 &\leq \frac{1}{n\gamma} \log(C_1). \tag{19}
 \end{aligned}$$

To bound the second expectation we use the fact that  $C^2 = (C_{\mu,k} + C_{n,k})^2 \leq 2C_{\mu,k}^2 + 2C_{n,k}^2$  where  $C_{\mu,k}$  is independent of the set  $\{x_i\}_{i=1}^n$  to focus only on the term  $C_{n,k}$ . Here we have that

$$\mathbb{E}[C_{n,k}^2] := \mathbb{E} \left[ \max_{i=1, \dots, n} k(x_i, x_i) \right] = \mathbb{E} \left[ \frac{1}{\gamma} \log \max_{i=1, \dots, n} e^{\gamma k(x_i, x_i)} \right] \tag{20}$$

$$\begin{aligned}
 &\leq \mathbb{E} \left[ \frac{1}{\gamma} \log \sum_{i=1}^n e^{\gamma k(x_i, x_i)} \right] \\
 &\leq \frac{1}{\gamma} \log \left( \sum_{i=1}^n \mathbb{E} \left[ e^{\gamma k(x_i, x_i)} \right] \right) = \frac{\log(nC_1)}{\gamma}. \tag{21}
 \end{aligned}$$

Thus we arrive at the overall bound

$$\mathbb{E} \left[ \text{MMD}_{\mu,k} \left( \frac{1}{ms} \sum_{i=1}^m \sum_{j=1}^s \delta(x_{\pi(i,j)}) \right)^2 \right] \leq \frac{\log(C_1)}{n\gamma} + 2 \left( C_{\mu,k}^2 + \frac{\log(nC_1)}{\gamma} \right) \left( \frac{1 + \log m}{m} \right),$$

as claimed.  $\square$

**Remark:** We observe that, in the myopic case only ( $s = 1$ ), one can alternatively recover Theorem 2 as a consequence of Theorem 2 in Riabiz et al. (2020), once again using the observation that the kernel in (16) satisfies the preconditions of Theorem 2 in Riabiz et al. (2020).

### A.3 Proof of Theorem 3

The following proof combines parts of the arguments used to establish Theorem 1 and Theorem 2, with additional notation required to deal with the mini-batching involved.

In a natural extension to the proof of Theorem 1, we define

$$\begin{aligned}
 a_m &:= (ms)^2 \text{MMD}_{\mu, k} \left( \frac{1}{ms} \sum_{i=1}^m \sum_{j=1}^s \delta(x_{\pi(i,j)}^i) \right)^2 \\
 &= \sum_{i=1}^m \sum_{i'=1}^m \sum_{j=1}^s \sum_{j'=1}^s k(x_{\pi(i,j)}^i, x_{\pi(i',j')}^{i'}) - 2ms \sum_{i=1}^m \sum_{j=1}^s \int k(x_{\pi(i,j)}^i, x) d\mu(x) + (ms)^2 \iint k(x, x') d\mu(x) d\mu(x') \\
 f_m(\cdot) &:= \sum_{i=1}^m \sum_{j=1}^s k(x_{\pi(i,j)}^i, \cdot) - ms \int k(\cdot, x) d\mu(x)
 \end{aligned}$$

and note immediately that  $a_m = \|f_m\|_{\mathcal{H}}^2$ . Then, similarly to Theorem 1, we write a recursive relation

$$\begin{aligned}
 a_m &= a_{m-1} + \underbrace{\sum_{j=1}^s \sum_{j'=1}^s k(x_{\pi(m,j)}^m, x_{\pi(m,j')}^m) + 2 \sum_{i=1}^{m-1} \sum_{j=1}^s \sum_{j'=1}^s k(x_{\pi(m,j)}^m, x_{\pi(i,j')}^i) - 2ms \sum_{j=1}^s \int k(x_{\pi(m,j)}^m, x) d\mu(x)}_{(*)} \\
 &\quad - \underbrace{2s \sum_{i=1}^{m-1} \sum_{j=1}^s \int k(x_{\pi(i,j)}^i, x) d\mu(x) + s^2(2m-1) \iint k(x, x') d\mu(x) d\mu(x')}_{(**)}.
 \end{aligned}$$

We will first derive an upper bound for (\*), then one for (\*\*).

**Bounding (\*):** Noting that at iteration  $m$  the algorithm chooses the  $S \in \{1, \dots, b\}^s$  that minimises

$$\begin{aligned}
 \sum_{j \in S} \sum_{j' \in S} k(x_j^m, x_{j'}^m) + 2 \sum_{j \in S} \sum_{j'=1}^s \sum_{i=1}^{m-1} k(x_j^m, x_{\pi(i,j')}^i) - 2ms \sum_{j \in S} \int k(x_j^m, x) d\mu(x) \\
 = \sum_{j \in S} \sum_{j' \in S} k(x_j^m, x_{j'}^m) - 2s \sum_{j \in S} \int k(x_j^m, x) d\mu(x) + 2 \sum_{j \in S} f_{m-1}(x_j^m),
 \end{aligned}$$

we have that

$$\begin{aligned}
 (*) &= \min_{S \in \{1, \dots, b\}^s} \left[ \sum_{j \in S} \sum_{j' \in S} k(x_j^m, x_{j'}^m) - 2s \sum_{j \in S} \int k(x_j^m, x) d\mu(x) + 2 \sum_{j \in S} f_{m-1}(x_j^m) \right] \\
 &\leq \max_{S \in \{1, \dots, b\}^s} \left[ \sum_{j \in S} \sum_{j' \in S} k(x_j^m, x_{j'}^m) - 2s \sum_{j \in S} \int k(x_j^m, x) d\mu(x) \right] + 2 \min_{S \in \{1, \dots, b\}^s} \sum_{j \in S} f_{m-1}(x_j^m) \\
 &= \max_{S \in \{1, \dots, b\}^s} \left[ \sum_{j \in S} \sum_{j' \in S} k(x_j^m, x_{j'}^m) - 2s \sum_{j \in S} \int \langle k(x_j^m, \cdot), k(x, \cdot) \rangle_{\mathcal{H}} d\mu(x) \right] + 2 \min_{S \in \{1, \dots, b\}^s} \sum_{j \in S} f_{m-1}(x_j^m) \quad (22) \\
 &\leq \max_{S \in \{1, \dots, n\}^b} \left[ \sum_{j \in S} \sum_{j' \in S} k(x_j^m, x_{j'}^m) + 2s \sum_{j \in S} \|k(x_j^m, \cdot)\|_{\mathcal{H}} \cdot \int \|k(x, \cdot)\|_{\mathcal{H}} d\mu(x) \right] + 2 \min_{S \in \{1, \dots, b\}^s} \sum_{j \in S} f_{m-1}(x_j^m) \quad (23) \\
 &\leq s^2 \max_{j \in \{1, \dots, b\}} k(x_j^m, x_j^m) + 2s^2 \max_{j \in \{1, \dots, b\}} \sqrt{k(x_j^m, x_j^m)} \cdot \int \sqrt{k(x, x)} d\mu(x) + 2 \min_{S \in \{1, \dots, b\}^s} \sum_{j \in S} f_{m-1}(x_j^m)
 \end{aligned}$$

$$\begin{aligned}
 &\leq s^2 C_{b,m,k}^2 + 2s^2 C_{b,m,k} \left( \int k(x,x) d\mu(x) \right)^{1/2} + 2 \min_{S \in \{1, \dots, b\}^s} \sum_{j \in S} f_{m-1}(x_j^m) \\
 &= s^2 C_{b,m,k}^2 + 2s^2 C_{b,m,k} C_{\mu,k} + 2 \min_{S \in \{1, \dots, b\}^s} \sum_{j \in S} f_{m-1}(x_j^m)
 \end{aligned} \tag{24}$$

In (22) we used the reproducing property. In (23) we used the Cauchy–Schwarz inequality. In (24) we used Jensen’s inequality.

To bound the third term, we write

$$\min_{S \in \{1, \dots, b\}^s} \sum_{j \in S} f_{m-1}(x_j^m) = \min_{S \in \{1, \dots, b\}^s} \left\langle f_{m-1}, \sum_{j \in S} k(\cdot, x_j^m) \right\rangle_{\mathcal{H}}$$

Define  $\mathcal{M}_m$  as the convex hull in  $\mathcal{H}$  of  $\left\{ s^{-1} \sum_{j \in S} k(\cdot, x_j^m), S \in \{1, \dots, b\}^s \right\}$ . Since the extreme points of  $\mathcal{M}_m$  correspond to the vertices  $(x_i^m, \dots, x_i^m)$  we have that

$$\mathcal{M}_m = \left\{ \sum_{i=1}^n c_i k(\cdot, x_i^m) : c_i \geq 0, \sum_{i=1}^n c_i = 1 \right\}$$

Then we have for any  $h \in \mathcal{M}_m$

$$\langle f_{m-1}, h \rangle_{\mathcal{H}} = \left\langle f_{m-1}, \sum_{i=1}^n c_i k(\cdot, x_i^m) \right\rangle_{\mathcal{H}} = \sum_{i=1}^n c_i f_{m-1}(x_i^m)$$

This linear combination is clearly minimised by taking the  $x_j^m \in \{x_i^m\}_{i=1}^b$  that minimises  $f_{m-1}(x_j^m)$ , and taking the corresponding  $c_j = 1$ , and all other  $c_i = 0$ . Now consider the element  $h_w^m = \sum_{i=1}^b w_i^m k(\cdot, x_i^m)$  for which the weights are equal to the optimal weight vector  $w^m$ . Clearly  $h_w^m \in \mathcal{M}_m$ . Thus

$$\min_{S \in \{1, \dots, b\}^s} \sum_{j \in S} f_{m-1}(x_j^m) = s \cdot \inf_{h \in \mathcal{M}_m} \langle f_{m-1}, h \rangle_{\mathcal{H}} \leq s \cdot \langle f_{m-1}, h_w^m \rangle_{\mathcal{H}}.$$

**Bounding (\*\*):** Our bound on (\*\*) is actually just an equality:

$$\begin{aligned}
 (**) &= -2s \left[ \sum_{i=1}^{m-1} \sum_{j=1}^s \int k(x_{\pi(i,j)}^i, x) d\mu(x) + s(m-1) \iint k(x, x') d\mu(x) d\mu(x') \right] \\
 &\quad + s^2 \iint k(x, x') d\mu(x) d\mu(x') \\
 &= -2s \langle f_{m-1}, h_{\mu} \rangle_{\mathcal{H}} + s^2 \|h_{\mu}\|_{\mathcal{H}}^2
 \end{aligned}$$

where  $h_{\mu} = \int k(\cdot, x) d\mu(x)$ .

**Bound on the Iterates:** Combining our bounds on (\*) and (\*\*) leads to the following bound on the iterates:

$$\begin{aligned}
 a_m &\leq a_{m-1} + s^2 C_{b,m,k}^2 + 2s^2 C_{b,m,k} C_{\mu,k} + 2s \langle f_{m-1}, h_w^m \rangle_{\mathcal{H}} - 2s \langle f_{m-1}, h_{\mu} \rangle_{\mathcal{H}} + s^2 \|h_{\mu}\|_{\mathcal{H}}^2 \\
 &= a_{m-1} + s^2 C_{b,m,k}^2 + 2s^2 C_{b,m,k} C_{\mu,k} + 2s \langle f_{m-1}, h_w^m - h_{\mu} \rangle_{\mathcal{H}} + s^2 \|h_{\mu}\|_{\mathcal{H}}^2 \\
 &\leq a_{m-1} + s^2 C_{b,m,k}^2 + 2s^2 C_{b,m,k} C_{\mu,k} + 2s \|f_{m-1}\|_{\mathcal{H}} \cdot \|h_w^m - h_{\mu}\|_{\mathcal{H}} + s^2 \|h_{\mu}\|_{\mathcal{H}}^2 \\
 &\leq a_{m-1} + (s^2 C_{b,m,k}^2 + 2s^2 C_{b,m,k} C_{\mu,k} + s^2 C_{\mu,k}^2) + 2s \sqrt{a_{m-1}} \cdot \|h_w^m - h_{\mu}\|_{\mathcal{H}}
 \end{aligned}$$

The last line arises because

$$\|h_{\mu}\|_{\mathcal{H}}^2 = \iint k(x, x') d\mu(x) d\mu(x') = \iint \langle k(x, \cdot), k(x', \cdot) \rangle d\mu(x) d\mu(x') \tag{25}$$

$$\begin{aligned}
 &\leq \iint |\langle k(x, \cdot), k(x', \cdot) \rangle| d\mu(x) d\mu(x') \\
 &\leq \iint \|k(x, \cdot)\|_{\mathcal{H}} \|k(x', \cdot)\|_{\mathcal{H}} d\mu(x) d\mu(x') \tag{26}
 \end{aligned}$$

$$\begin{aligned}
 &= \left( \int \sqrt{k(x, x)} d\mu(x) \right)^2 \\
 &\leq \int k(x, x) d\mu(x) = C_{\mu, k}^2 \tag{27}
 \end{aligned}$$

In (25) we used the reproducing property. In (26) we used the Cauchy–Schwarz inequality. In (27) we used Jensen’s inequality.

We now note that

$$\begin{aligned}
 \|h_w^m - h_\mu\|_{\mathcal{H}}^2 &= \langle h_w^m - h_\mu, h_w^m - h_\mu \rangle_{\mathcal{H}} \\
 &= \left\langle \sum_{i=1}^b w_i^m k(\cdot, x_i^m) - \int k(\cdot, x) d\mu(x), \sum_{i'=1}^b w_{i'}^m k(\cdot, x_{i'}^m) - \int k(\cdot, x') d\mu(x') \right\rangle_{\mathcal{H}} \\
 &= \sum_{i=1}^b \sum_{i'=1}^b w_i^m w_{i'}^m k(x_i^m, x_{i'}^m) - 2 \sum_{i=1}^b w_i^m \int k(x_i^m, x) d\mu(x) + \iint k(x, x') d\mu(x) d\mu(x') \\
 &= \text{MMD}_{\mu, k} \left( \sum_{i=1}^b w_i^m \delta(x_i^m) \right)^2 =: \Phi_m^2,
 \end{aligned}$$

which gives

$$a_m \leq a_{m-1} + s^2(C_{b, m, k} + C_{\mu, k})^2 + 2s\sqrt{a_{m-1}} \cdot \Phi_m.$$

We then follow a similar argument to Theorem 1 in Riabiz et al. (2020) to establish an induction in  $a_m$ .

**Inductive Argument:** Let  $c_m^2 := (C_{b, m, k} + C_{\mu, k})^2$ . We assert

$$\mathbb{E}[a_m] \leq (sm)^2 \mathbb{E}[\Phi_m^2 + K_m], \quad \text{with} \quad K_m := \frac{1}{m} (c_m^2 - \Phi_m^2) \sum_{j=1}^m \frac{1}{j}$$

For  $m = 1$ , the induction holds since  $a_1 \leq s^2 c_1$ . We now assume that  $\mathbb{E}[a_{m-1}] \leq s^2(m-1)^2 \mathbb{E}[\Phi_{m-1}^2 + K_{m-1}]$ . Then

$$\begin{aligned}
 \mathbb{E}[a_m] &\leq \mathbb{E}[a_{m-1}] + s^2 \mathbb{E}[c_m^2] + 2s \mathbb{E}[\sqrt{a_{m-1}} \cdot \Phi_m] \\
 &= \mathbb{E}[a_{m-1}] + s^2 \mathbb{E}[c_m^2] + 2s \mathbb{E}[\sqrt{a_{m-1}}] \cdot \mathbb{E}[\Phi_m] \quad (\text{independence of } a_{m-1} \text{ and } \Phi_m) \\
 &\leq \mathbb{E}[a_{m-1}] + s^2 \mathbb{E}[c_m^2] + 2s \sqrt{\mathbb{E}[a_{m-1}]} \cdot \mathbb{E}[\Phi_m] \quad (\text{Jensen's inequality}) \\
 &\leq s^2(m-1)^2 \mathbb{E}[\Phi_{m-1}^2 + K_{m-1}] + s^2 \mathbb{E}[c_m^2] + 2s^2(m-1) \mathbb{E}[\Phi_m] \sqrt{\mathbb{E}[\Phi_{m-1}^2 + K_{m-1}]} \\
 &\leq s^2(m-1)^2 \mathbb{E}[\Phi_m^2 + K_{m-1}] + s^2 \mathbb{E}[c_m^2] + 2s^2(m-1) \mathbb{E}[\Phi_m] \sqrt{\mathbb{E}[\Phi_m^2 + K_{m-1}]} \quad (\text{since } \Phi_{m-1} \stackrel{d}{=} \Phi_m) \\
 &\leq s^2(m-1)^2 \mathbb{E}[\Phi_m^2 + K_{m-1}] + s^2 \mathbb{E}[c_m^2] + 2s^2(m-1) \mathbb{E}[\Phi_m^2]^{1/2} \sqrt{\mathbb{E}[\Phi_m^2 + K_{m-1}]} \quad (\text{Jensen's inequality}) \\
 &\leq s^2 [(m-1)^2 \mathbb{E}[\Phi_m^2 + K_{m-1}] + \mathbb{E}[c_m^2] + (m-1)(2\mathbb{E}[\Phi_m^2] + \mathbb{E}[K_{m-1}])] \tag{28} \\
 &= s^2 \mathbb{E} [(m^2 - 1)\Phi_m^2 + m(m-1)K_{m-1} + c_m^2] \\
 &= s^2 \mathbb{E} \left[ (m^2 - 1)\Phi_m^2 + m(c_{m-1}^2 - \Phi_{m-1}^2) \sum_{j=1}^{m-1} \frac{1}{j} + c_m^2 \right] \\
 &= s^2 \mathbb{E} \left[ (m^2 - 1)\Phi_m^2 + m(c_{m-1}^2 - \Phi_{m-1}^2) \sum_{j=1}^m \frac{1}{j} - m(c_{m-1}^2 - \Phi_{m-1}^2) \frac{1}{m} + c_m^2 \right] \\
 &= s^2 \mathbb{E} \left[ (m^2 - 1)\Phi_m^2 + m(c_{m-1}^2 - \Phi_{m-1}^2) \sum_{j=1}^m \frac{1}{j} - m(c_m^2 - \Phi_m^2) \frac{1}{m} + c_m^2 \right] \quad (\text{since } c_{m-1} \stackrel{d}{=} c_m, \Phi_{m-1} \stackrel{d}{=} \Phi_m)
 \end{aligned}$$



$$\begin{aligned}
 &= s^2 \mathbb{E} \left[ m^2 \Phi_m^2 + m(c_{m-1}^2 - \Phi_{m-1}^2) \sum_{j=1}^m \frac{1}{j} \right] \\
 &= (sm)^2 \mathbb{E}[\Phi_m^2 + K_m]
 \end{aligned}$$

which proves the induction. The line (28) follows from the second by the fact that for any  $a, b > 0$ , it holds that  $2a\sqrt{a^2 + b} \leq 2a^2 + b$ .

**Overall Bound:** We now show that  $\Phi_m^2 \leq c_m^2$ , by writing

$$\Phi_m^2 = \|h_w^m - h_\mu\|_{\mathcal{H}}^2 \leq \|h_w^m\|_{\mathcal{H}}^2 + 2\|h_w^m\|_{\mathcal{H}} \cdot \|h_\mu\|_{\mathcal{H}} + \|h_\mu\|_{\mathcal{H}}^2$$

and noting that since  $\sum_{i=1}^n w_i^m = 1$ , it holds that

$$\|h_w^m\|_{\mathcal{H}}^2 = \sum_{i=1}^b \sum_{i'=1}^b w_i^m w_{i'}^m k(x_i^m, x_{i'}^m) \leq C_{b,m,k}^2.$$

We have already shown that  $\|h_\mu\|^2 \leq C_{\mu,k}^2$ , thus it follows that  $\Phi_m^2 \leq C_{b,m,k}^2 + 2C_{b,m,k}C_{\mu,k} + C_{\mu,k}^2 = c_m^2$  as required. Using this bound in conjunction with the elementary series inequality  $\sum_{j=1}^m j^{-1} \leq (1 + \log m)$ , we have  $K_m \geq 0$  and

$$K_m = \frac{1}{m}(c_m^2 - \Phi_m^2) \sum_{j=1}^m \frac{1}{j} \leq \frac{1}{m} c_m^2 \sum_{j=1}^m \frac{1}{j} \leq \left( \frac{1 + \log m}{m} \right) c_m^2$$

An identical argument to that used between (20) and (21) shows that

$$\mathbb{E}[C_{b,m,k}^2] = \frac{\log(nC_1)}{\gamma}$$

and therefore

$$\mathbb{E}[c_m^2] \leq 2C_{\mu,k}^2 + 2\mathbb{E}[C_{b,m,k}^2] \leq 2C_{\mu,k}^2 + \frac{2\log(bC_1)}{\gamma}.$$

An identical argument to (18)-(19) gives that

$$\mathbb{E}[\Phi_m^2] \leq \frac{\log(C_1)}{b\gamma}$$

From this the theorem follows by noting

$$\begin{aligned}
 \mathbb{E} \left[ \text{MMD}_{\mu,k} \left( \frac{1}{ms} \sum_{i=1}^m \sum_{j=1}^s \delta(x_{\pi(i,j)}^i) \right)^2 \right] &= \frac{\mathbb{E}[a_m]}{(sm)^2} \leq \mathbb{E}[\Phi_m^2] + \left( \frac{1 + \log m}{m} \right) \mathbb{E}[c_m^2] \\
 &\leq \frac{\log(C_1)}{b\gamma} + 2 \left( C_{\mu,k}^2 + \frac{\log(bC_1)}{\gamma} \right) \left( \frac{1 + \log m}{m} \right).
 \end{aligned}$$

□

This argument relied on independence between mini-batches and therefore it may not easily generalise to the MCMC context.

**Remarks:** We observe that, in the myopic case only ( $s = 1$ ), one can alternatively recover Theorem 3 as a consequence of Theorem 6 in Chen et al. (2019), once again using the observation that the kernel in (16) satisfies the preconditions of Theorem 6 in Chen et al. (2019).

The argument used to prove Theorem 3 relies on independence between mini-batches and therefore it may not easily generalise to the MCMC context, in which this is unlikely to be true. Theorem 7 in Chen et al. (2019) considered a particular form of dependence between mini-batches (once again, only for the case  $s = 1$ ), but this result does not directly apply to mini-batches sampled from MCMC output.

#### A.4 Proof of Theorem 4

The argument below is almost identical to that used in Theorem 2 of Riabiz et al. (2020), with most of the effort required to handle the non-myopic optimisation having already been performed in Theorem 1. In particular, it relies on the following technical result:

**Lemma 1** (Lemma 3 in Riabiz et al. (2020)). *Let  $\mathcal{X}$  be a measurable space and let  $\mu$  be a probability distribution on  $\mathcal{X}$ . Let  $k : \mathcal{X} \times \mathcal{X} \rightarrow \mathbb{R}$  be a reproducing kernel with  $\int k(x, \cdot) d\mu(x) = 0$  for all  $x \in \mathcal{X}$ . Consider a  $\mu$ -invariant, time-homogeneous reversible Markov chain  $(x_i)_{i \in \mathbb{N}} \subset \mathcal{X}$  generated using a  $V$ -uniformly ergodic transition kernel, such that  $V(x) \geq \sqrt{k(x, x)}$  for all  $x \in \mathcal{X}$ , with parameters  $R \in [0, \infty)$  and  $\rho \in (0, 1)$  as in (7). Then we have that*

$$\sum_{i=1}^n \sum_{r \in \{1, \dots, n\} \setminus \{i\}} \mathbb{E}[k(x_i, x_r)] \leq C_3 \sum_{i=1}^{n-1} \mathbb{E}[\sqrt{k(x_i, x_i)} V(X_i)]$$

with  $C_3 := \frac{2R\rho}{1-\rho}$ . □

The proof starts in a similar manner to the proof of Theorem 2, taking expectations of the bound obtained in Theorem 1 to arrive at (17).

An identical argument to that used in the proof of Theorem 2 allows us to bound

$$\mathbb{E}[C^2] \leq 2 \left( C_{\mu, k}^2 + \frac{\log(nC_1)}{\gamma} \right).$$

Thus it remains to bound the first term in (17) under the assumptions that we have made on the Markov chain  $(x_i)_{i \in \mathbb{N}}$ . To this end, we have that

$$\begin{aligned} \mathbb{E} \left[ \min_{\substack{1^T w = 1 \\ w_i \geq 0}} \text{MMD}_{\mu, k} \left( \sum_{i=1}^n w_i \delta(x_i) \right)^2 \right] &\leq \mathbb{E} \left[ \text{MMD}_{\mu, k} \left( \frac{1}{n} \sum_{i=1}^n \delta(x_i) \right)^2 \right] \\ &= \mathbb{E} \left[ \frac{1}{n^2} \sum_{i=1}^n \sum_{j=1}^n k(x_i, x_j) - \frac{2}{n} \sum_{i=1}^n \int k(x, x_i) d\mu(x) + \iint k(x, y) d\mu(x) d\mu(y) \right] \\ &= \mathbb{E} \left[ \frac{1}{n^2} \sum_{i=1}^n \sum_{j=1}^n k(x_i, x_j) \right] \quad (\text{since } \int k(x, \cdot) d\mu(x) = 0) \\ &= \mathbb{E} \left[ \frac{1}{n^2} \sum_{i=1}^n k(x_i, x_i) \right] + \mathbb{E} \left[ \frac{1}{n^2} \sum_{i=1}^n \sum_{j \neq i} k(x_i, x_j) \right]. \end{aligned} \quad (29)$$

The first term in (29) is handled as follows:

$$\begin{aligned} \frac{1}{n^2} \sum_{i=1}^n \mathbb{E}[k(x_i, x_i)] &= \frac{1}{n^2} \sum_{i=1}^n \mathbb{E} \left[ \frac{1}{\gamma} \log e^{\gamma k(x_i, x_i)} \right] \\ &\leq \frac{1}{\gamma n^2} \sum_{i=1}^n \log \left( \mathbb{E} \left[ e^{\gamma k(x_i, x_i)} \right] \right) \leq \frac{\log(C_1)}{\gamma n} \end{aligned}$$

The second term in (29) can be controlled using Lemma 1:

$$\mathbb{E} \left[ \frac{1}{n^2} \sum_{i=1}^n \sum_{j \neq i} k(x_i, x_j) \right] \leq \frac{C}{n^2} \sum_{i=1}^{n-1} \mathbb{E} \left[ \sqrt{k(x_i, x_i)} V(X_i) \right] \leq \frac{C_3}{n^2} (n-1) C_2 \leq \frac{C_2 C_3}{n}.$$

Thus we arrive at the overall bound

$$\mathbb{E} \left[ \text{MMD}_{\mu, k} \left( \frac{1}{ms} \sum_{i=1}^m \sum_{j=1}^s \delta(x_{\pi(i, j)}) \right)^2 \right] \leq \frac{\log(C_1)}{n\gamma} + \frac{C_2 C_3}{n} + 2 \left( C_{\mu, k}^2 + \frac{\log(nC_1)}{\gamma} \right) \left( \frac{1 + \log m}{m} \right),$$

as claimed. □

## B Semidefinite Relaxation

In this supplement we briefly explain how to construct a relaxation of the discrete optimisation problem (5). The standard technique for relaxation of a quadratic programme of this form is to construct an approximating semidefinite programme (SDP). This not only convexifies the problem but also replaces a quadratic problem in  $v$  with a linear problem in a semidefinite matrix  $M$ . To simplify the presentation we consider<sup>5</sup> the BQP setting of Remark 1, so that  $v \in \{0, 1\}^n$ . We also employ a change of variable  $\tilde{v}_j := 2v_j - 1$ , so that  $\tilde{v} \in \{-1, 1\}^n$ . By analogy with (4) we recast an optimal subset  $\pi$  as the solution to the following BQP.

$$\underset{\tilde{v} \in \{-1, 1\}^n}{\operatorname{argmin}} \tilde{v}^\top K \tilde{v} + 2(\mathbf{1}^\top K + c_j^{i^\top}) \tilde{v}, \text{ s.t. } \mathbf{1}^\top \tilde{v} = 2s - n. \quad (30)$$

The relaxation treats  $\tilde{v}$  as a continuous variable whose feasible set is the entire convex hull of  $\{-1, 1\}^n$ . Define  $\tilde{V} = \tilde{v}\tilde{v}^\top$  and then relax this non-convex equality, so that  $\tilde{V} - \tilde{v}\tilde{v}^\top \succeq 0$  rather than the  $\tilde{V} - \tilde{v}\tilde{v}^\top = 0$ . Then rewrite this as a Schur complement, using the relation:

$$M := \begin{pmatrix} 1 & \tilde{v}^\top \\ \tilde{v} & \tilde{V} \end{pmatrix} \succeq 0 \iff \tilde{V} - \tilde{v}\tilde{v}^\top \succeq 0$$

Consider now the two  $(n+1) \times (n+1)$  matrices constructed as follows

$$A = \begin{pmatrix} \mathbf{1}^\top K \mathbf{1} + 2c_j^{i^\top} & \mathbf{1}^\top K + c_j^{i^\top} \\ K \mathbf{1} + c_j^i & K \end{pmatrix} \quad B = \begin{pmatrix} 0 & \frac{1}{2}\mathbf{1}^\top \\ \frac{1}{2}\mathbf{1} & \mathbf{0}\mathbf{0}^\top \end{pmatrix}$$

The SDP relaxation of (30) is then

$$\begin{aligned} \text{minimise } M \bullet A \quad \text{s.t. } & \operatorname{diag}(M) = \mathbf{1} \\ & B \bullet M = 2s - n \\ & M \succeq 0 \end{aligned} \quad (31)$$

( $X \bullet Y \equiv \sum_{i,j=1}^n X_{ij}Y_{ij}$ ). Note that (31) collapses to (30) when  $\tilde{V} = \tilde{v}\tilde{v}^\top$  and  $\tilde{v} \in \{-1, 1\}^n$  are enforced. Note that if the cardinality constraint  $B \bullet M = 2s - n$  is omitted, then (31) is equivalent to the classical graph partitioning problem *MAX-CUT* (Goemans and Williamson, 1995).

The SDP (31) is linear in  $M$  and is soluble to within any  $\varepsilon > 0$  of the true optimum in polynomial time. Its solution  $M^*$ , however, only solves the BQP (30) if  $\tilde{V}^* = \tilde{v}^*\tilde{v}^{*\top}$ , or equivalently  $\operatorname{rank}(M^*) = 1$ . This will not be true in general and the second part of a relaxation procedure is to round the output  $\tilde{v}^* \in [-1, 1]^n$  to a feasible vector  $\tilde{v} \in \{-1, 1\}^n$  for the BQP. Goemans and Williamson (1995) introduced a popular randomised rounding approach for *MAX-CUT*, and for the following exploratory simulations we adopted a similar approach. This starts by performing an incomplete Cholesky decomposition  $\tilde{V}^* = UU^\top$  with  $\operatorname{rank}(U) = r$ . Since  $\operatorname{diag}(\tilde{V}^*) = \mathbf{1}$ , the columns of  $U$  all lie on the unit  $r$ -sphere.

To select exactly  $m$  points we draw a random hyperplane through the origin of this sphere and translate it affinely until exactly  $m$  points are separated from the rest (it is this translation that is a modification of the original approach for non-cardinality constrained problems, and which means the analysis of Goemans and Williamson (1995) is not directly applicable). The resulting approximations are presented only as an empirical benchmark for Algorithms 1-3 and the detailed analysis of rounding procedures is well beyond the scope of this work.

We also find improved output by drawing  $R > 1$  points on the  $r$ -sphere and choosing the one for which the points separated off are best, in the sense of lowest cumulative KSD. This process imposes trivial additional computational cost. The semi-definite optimisations are performed using the `Python` optimisation package `MOSEK`.

Figure 5 shows that the semi-definite relaxation approach can be competitive in time-adjusted KSD. Each line in left pane represents the drawing of 1000 samples. The non-relaxed and best-of-50 SDR approaches closely mirror each other in time-adjusted KSD, though the non-relaxed approach is more efficient in that it achieves the same KSD in the same time with fewer samples chosen. Choosing  $R > 1$  imposes little additional computation time, leading to a performance improvement for  $R = 50$  over  $R = 10$ , though past a certain point (visible here for  $R = 200$ ) this additional computation does become significant and harms performance.

<sup>5</sup>The more general IQP setting, in which candidate points can be repeatedly selected, can similarly be cast as an SDP by proceeding with  $s$  copies of the candidate set and  $v \in \{0, 1\}^{ns}$ .

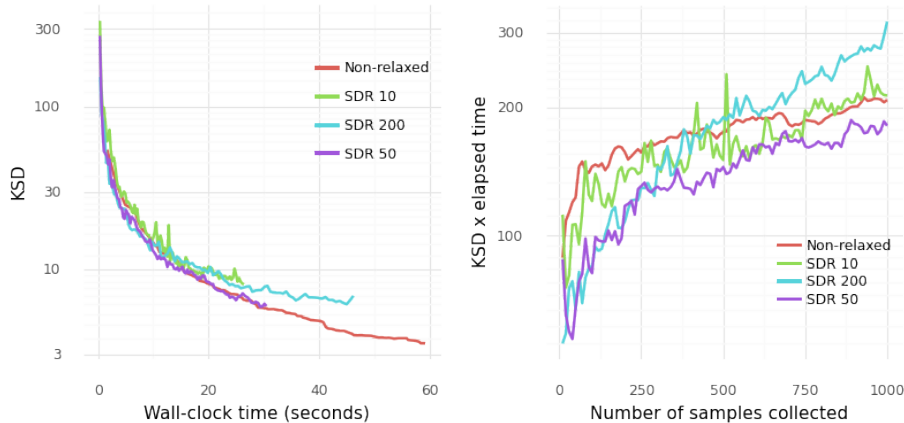

Figure 5: KSD vs. wall-clock time, and time-adjusted KSD vs. number of selected samples, for the 4-dim Lotka–Volterra model also used in Section 4, and with the same kernel specification. We draw 1000 samples using batch-size  $b = 100$  and choosing  $s = 10$  points simultaneously at each iteration. The four lines refer to the non-relaxed method (generated using the same code as in Figure 3), as well as the approach employing semi-definite relaxation (taking the best of 10, 50 and 200 point selections, determined by drawing that many points on the sphere).

### C Choice of Kernel

As with all kernel-based methods, the specification of the kernel itself is of key importance. For the MMD experiments in Section 4.1, we employed the squared-exponential kernel  $k(x, y; \ell) = \exp(-\frac{1}{2}\ell^{-2}\|x - y\|^2)$ , and for the KSD experiments in Section 4.2 we followed Chen et al. (2018, 2019) and Riabiz et al. (2020) and used the inverse multi-quadric kernel  $k(x, y; \ell) = (1 + \ell^{-2}\|x - y\|^2)^{-1/2}$  as the ‘base kernel’  $k$  in (3) from which the compound Stein kernel  $k_\mu$  is built up. The latter choice ensures that, under suitable conditions on  $\mu$ , KSD controls weak convergence to  $\mu$  in  $\mathcal{P}(\mathbb{R}^d)$ , meaning that if  $\text{MMD}_{\mu, k_\mu}(\nu) \rightarrow 0$  then  $\nu \Rightarrow \mu$  (Gorham and Mackey, 2017, Thm. 8).

The next consideration is the length scale  $\ell$ . There are several possible approaches. For the simulations in Sections 4.1 and 4.2, we use the median heuristic (Garreau et al., 2017). The length-scale  $\hat{\ell}$  is calculated from the dataset themselves, using the formula  $\hat{\ell} = \sqrt{\frac{1}{2}\text{Med}\{\|x_i - x_j\|^2\}}$ . The indices  $i, j$  can run over the entire dataset, or more commonly in practice, a uniformly-sampled subset of it. For the large datasets in Section 4, we use 1000 points to calculate  $\hat{\ell}$ .

To explore the impact of the choice of length scale on the approximations that our methods produce, in Figure 6 we start with  $\hat{\ell} = 0.25$  (the value used to produce Figure 1 in the main text) and now vary this parameter, considering  $0.1\hat{\ell}$  and  $10\hat{\ell}$ . The difference in the quality of the approximation of  $\nu$  to  $\mu$  is immediately visually evident, even for such a simple model. It appears that, at least in this instance, the median heuristic is helpful in avoiding pathologies that can occur when an inappropriate length-scale is used.

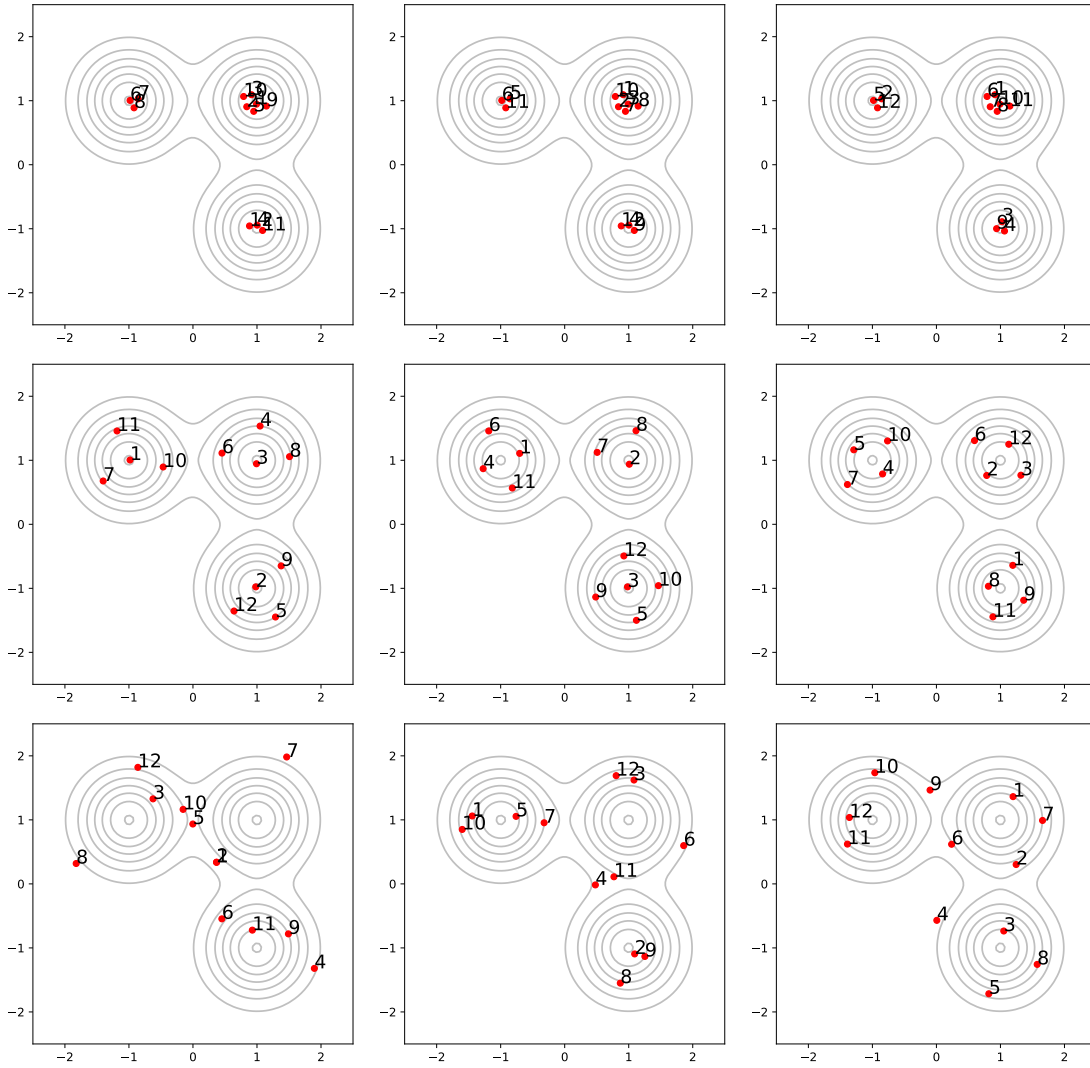

Figure 6: Investigating the role of the length-scale parameter  $\ell$  in the squared-exponential kernel  $k(x, y; \ell) = \exp(-\frac{1}{2}\ell^{-2}\|x - y\|^2)$ . Model and simulation set-up as in Figure 1. Here 12 representative points were selected using the myopic method (left column), a non-myopic method (centre column), and by simultaneous selection of all 12 points (right column). The kernel length-scale parameter  $\ell$  set to 0.025 (top row), 0.25 (middle row; as Figure 1) and 2.5 (bottom row).
